# Supplementary material for: Adalimumab in Japanese patients with active ulcers of pyoderma gangrenosum: Final analysis of a 52‐week phase 3 open‐label study
Source: PubMed Central journal article supplement (PMC9313851; doi:10.1111/1346-8138.16337), 2022-03-03
Supplement: JDE-49-479-s001.pdf [file JDE-49-479-s001.pdf]

**Adalimumab in Japanese Patients with Active Ulcers of Pyoderma Gangrenosum:  
Final Analysis of a 52-Week Phase 3 Open-label Study**

Kenshi Yamasaki, Keiichi Yamanaka, Yiwei Zhao, Shunsuke Iwano, Keiko Takei, Koji Suzuki, Toshiyuki Yamamoto

**Supplementary Material**

**Table S1.** Investigator Inflammation Assessment (From Wilkes *et al.* 2016, *J Am Acad Dermatol* <http://dx.doi.org/10.1016/j.jad.2016.07.049>)

| <b>Severity rating score</b> |             | <b>Description</b>                                                    |
|------------------------------|-------------|-----------------------------------------------------------------------|
| <b>Erythema</b>              |             |                                                                       |
| 0                            | None        | No erythema                                                           |
| 1                            | Slight      | Mild pink color                                                       |
| 2                            | Moderate    | Moderate pink color                                                   |
| 3                            | Severe      | Reddish color                                                         |
| 4                            | Very severe | Dark red or violaceous                                                |
| <b>Border elevation</b>      |             |                                                                       |
| 0                            | None        | Border is flat with ulcer and surrounding skin, no elevation          |
| 1                            | Slight      | Slight elevation of border above ulceration and surrounding skin      |
| 2                            | Moderate    | Noticeable elevation of border above ulceration and surrounding skin  |
| 3                            | Severe      | Significant elevation of border above ulceration and surrounding skin |
| 4                            | Very severe | Border rolled high above ulceration and surrounding skin              |

**Table S2** Physician's Global Assessment Scale. (From Wilkes *et al.* 2016, *J Am Acad Dermatol* <http://dx.doi.org/10.1016/j.jad.2016.07.049>)

| <b>Scale</b> | <b>Description</b>      |                                                                                                                                                                                                         |
|--------------|-------------------------|---------------------------------------------------------------------------------------------------------------------------------------------------------------------------------------------------------|
| <b>0</b>     | Completely clear        | Except for possible residual hyperpigmentation                                                                                                                                                          |
| <b>1</b>     | Almost clear            | Very significant clearance (about 90%); however, patchy remnants of dusky erythema and/or very small ulceration                                                                                         |
| <b>2</b>     | Marked improvement      | Significant improvement (about 75%); however, a small amount of disease remaining (ie, remaining ulcers, although have decreased in size, minimal erythema, and/or barely perceptible border elevation) |
| <b>3</b>     | Moderate improvement    | Intermediate between slight and marked; representing about 50% improvement                                                                                                                              |
| <b>4</b>     | Slight improvement      | Some improvement (about 25%); however, significant disease remaining (ie, remaining ulcers with only minor decrease in size, erythema, or border elevation)                                             |
| <b>5</b>     | No change from baseline |                                                                                                                                                                                                         |
| <b>6</b>     | Worse                   |                                                                                                                                                                                                         |

**Table S3. Specification, measurement, and PGAR calculation of target ulcer**

---

|    |                                                                                                                                                                                                                                              |
|----|----------------------------------------------------------------------------------------------------------------------------------------------------------------------------------------------------------------------------------------------|
| 1a | Examination of all ulcers at the screening visit                                                                                                                                                                                             |
| 1b | Specification of the target pyoderma gangrenosum (PG) ulcer; this does not change throughout the study<br><br>In the case of multiple PG ulcers, the target PG ulcer is the largest ulcer by area that can be photographed on a single plane |
| 3  | Photography of the target PG ulcer and all non-target PG ulcer(s) at specified visits                                                                                                                                                        |
| 4a | Using digital photography of a patient's target PG ulcer, borders (and internal epithelialized regions, if any) delineated, and ulcer area calculated (cm <sup>2</sup> ) using computerized planimetry (by external vendor)                  |
| 4b | Maximal width and height of the target PG ulcer and all non-target PG ulcers measured by the Investigator at specified visits                                                                                                                |
| 5  | The PGAR (PG area reduction) calculated as the percentage area change in the target PG ulcer from baseline by digital planimetry                                                                                                             |

---

|          |                                                                               |
|----------|-------------------------------------------------------------------------------|
| PGAR 100 | Pyoderma gangrenosum area reduction 100% (complete skin re-epithelialization) |
|----------|-------------------------------------------------------------------------------|

---

**Table S4.** Baseline demographics and disease characteristics of responders (achieving PGAR 100) and partial/non-responders at 26 weeks and 52 weeks

|                                                                       | 26 Weeks           |                                             | 52 Weeks          |                               |
|-----------------------------------------------------------------------|--------------------|---------------------------------------------|-------------------|-------------------------------|
|                                                                       | Responders<br>n=12 | Partial/non-responders <sup>†</sup><br>n=10 | Responders<br>n=6 | Partial/non-responders<br>n=3 |
| Female, n (%)                                                         | 5 (41.7)           | 7 (70.0)                                    | 4 (66.7)          | 1 (33.3)                      |
| Age, mean (SD), y                                                     | 48.6 (17.8)        | 65.7 (15.6)                                 | 56.5 (19.0)       | 69.0 (11.5)                   |
| BMI, mean (SD), kg/m <sup>2</sup>                                     | 25.2 (8.2)         | 25.9 (6.4)                                  | 29.0 (11.5)       | 29.6 (5.0)                    |
| Disease duration, mean (SD), y                                        | 4.8 (6.6)          | 1.5 (2.0)                                   | 5.5 (8.4)         | 2.6 (3.9)                     |
| Comorbidities, n (%)                                                  |                    |                                             |                   |                               |
| Hypertension                                                          | 4 (33.3)           | 6 (60.0)                                    | 5 (83.3)          | 1 (33.3)                      |
| Hyperlipidemia                                                        | 2 (16.7)           | 4 (40.0)                                    | 1 (16.7)          | 1 (33.3)                      |
| Hyperuricemia                                                         | 2 (16.7)           | 3 (30.0)                                    | 2 (33.3)          | 2 (66.7)                      |
| Osteoporosis                                                          | 0                  | 4 (40.0)                                    | 1 (16.7)          | 1 (33.3)                      |
| Ulcerative colitis                                                    | 3 (25.0)           | 1 (10.0)                                    | 1 (16.7)          | 0                             |
| Rheumatoid arthritis                                                  | 1 (8.3)            | 2 (20.0)                                    | 0                 | 1 (33.3)                      |
| Target PG ulcer area (digital planimetry), mean (SD), cm <sup>2</sup> | 29.8 (25.2)        | 37.5 (25.8)                                 | 36.7 (22.3)       | 24.0 (18.7)                   |
| IIA, moderate to very severe, n (%)                                   |                    |                                             |                   |                               |
| Erythema                                                              | 10 (83.3)          | 6 (60.0)                                    | 4 (66.7)          | 2 (66.7)                      |
| Border elevation                                                      | 8 (66.7)           | 7 (70.0)                                    | 5 (83.3)          | 2 (66.7)                      |
| Pain; NRS, mean (SD)                                                  | 4.2 (3.2)          | 5.2 (2.5)                                   | 5.5 (3.3)         | 4.0 (1.0)                     |
| DLQI, mean (SD)                                                       | 9.4 (8.5)          | 9.1 (5.8)                                   | 12.7 (9.4)        | 5.3 (3.5)                     |
| Corticosteroid use for PG, n (%) <sup>‡</sup>                         | 8/11 (72.7)        | 5/5 (100%)                                  | 4/5 (80.0)        | 1/1 (100)                     |

BMI, body mass index; DLQI, Dermatology Life Quality Index; IIA, investigator inflammation assessment; NRS, numeric rating scale; PG, pyoderma gangrenosum; PGAR 100, target PG ulcer area reduction 100 (defined as complete skin re-epithelialization); SD, standard deviation.

<sup>†</sup>Five of the 10 patients with partial or non-response to treatment discontinued before week 26 due to an adverse event or other reason.

<sup>‡</sup>Of patients using concomitant corticosteroids.

**Figure S1.** Digital planimetry of Target PG ulcers during 52 weeks of treatment. (a) Patient 1; (b) Patient 2; (c) Patient 3.

(a)

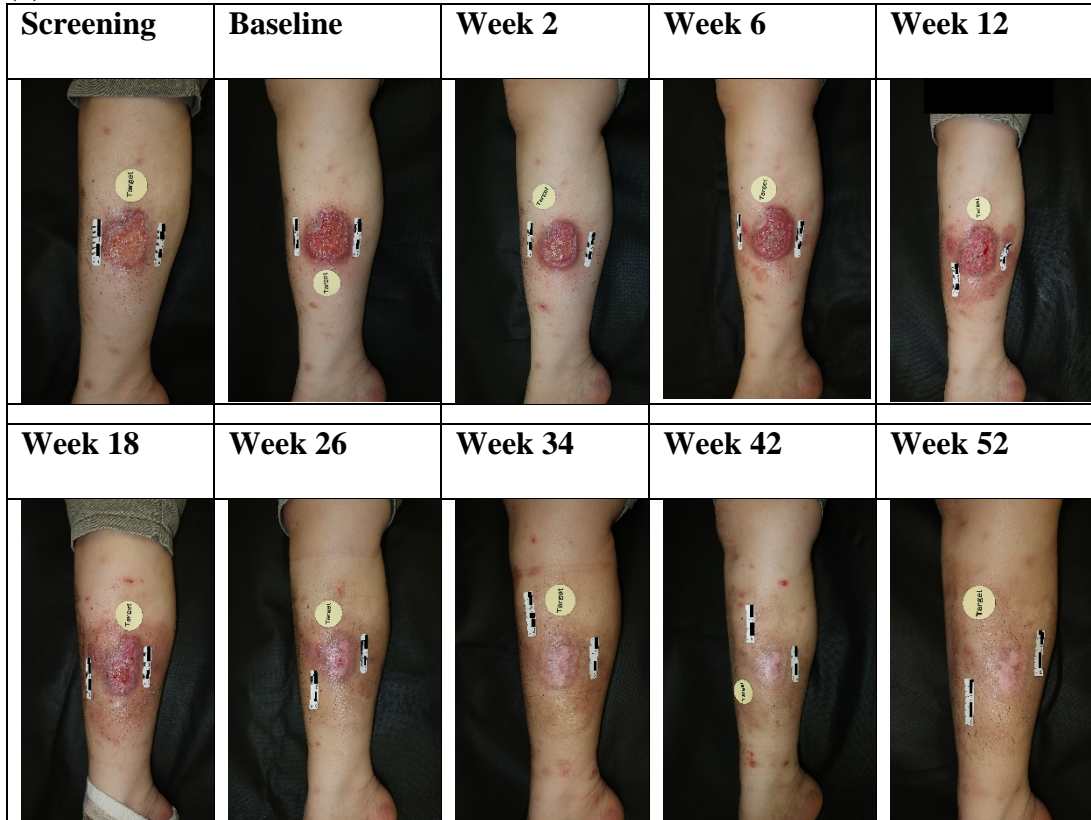

(b)

| Screening                                                                         | Baseline                                                                          | Week 2                                                                             | Week 6                                                                              | Week 12                                                                             |
|-----------------------------------------------------------------------------------|-----------------------------------------------------------------------------------|------------------------------------------------------------------------------------|-------------------------------------------------------------------------------------|-------------------------------------------------------------------------------------|
|  |  |  |  |  |
| Week 18                                                                           | Week 26                                                                           | Week 34                                                                            | Week 42                                                                             | Week 52                                                                             |
|  |  |   |  |  |

(c)

| Screening                                                                         | Baseline                                                                          | Week 2                                                                            | Week 6                                                                             | Week 12                                                                             |
|-----------------------------------------------------------------------------------|-----------------------------------------------------------------------------------|-----------------------------------------------------------------------------------|------------------------------------------------------------------------------------|-------------------------------------------------------------------------------------|
|  |  |  |  |  |
| Week 18                                                                           | Week 26                                                                           | Week 34                                                                           | Week 42                                                                            | Week 52                                                                             |
|  |  |  |  |  |
